# Supplementary material
Source: PubMed Central journal article supplement (PMC5407710)
Supplement: ASN.2015070745SupplementaryData.pdf [file ASN.2015070745SupplementaryData.pdf]

# Supplemental Data

## Moss-Produced, Glycosylation-Optimized Human Factor H for Therapeutic Application in Complement Disorders

Stefan Michelfelder,<sup>\*</sup> Juliana Parsons,<sup>†</sup> Lennard L. Bohlender,<sup>†</sup> Sebastian N.W. Hoernstein,<sup>†</sup> Holger Niederkrüger,<sup>‡</sup> Andreas Busch,<sup>‡</sup> Nicola Krieghoff,<sup>‡</sup> Jonas Koch,<sup>‡</sup> Benjamin Fode,<sup>‡</sup> Andreas Schaaf,<sup>‡</sup> Thomas Frischmuth,<sup>‡</sup> Martin Pohl,<sup>\*</sup> Peter F. Zipfel,<sup>§</sup> Ralf Reski,<sup>†|¶</sup> Eva L. Decker,<sup>†</sup> and Karsten Häffner<sup>\*</sup>

<sup>\*</sup>Department of Pediatrics and Adolescent Medicine, Faculty of Medicine, University of Freiburg Medical Center, Freiburg, Germany; <sup>†</sup>Plant Biotechnology, Faculty of Biology, University of Freiburg, Freiburg, Germany; <sup>‡</sup>Greenovation Biotech GmbH, Freiburg, Germany; <sup>§</sup>Leibniz Institute for Natural Product Research and Infection Biology, Friedrich Schiller University, Jena, Germany; <sup>|</sup>BIOSS Centre for Biological Signalling Studies, University of Freiburg, Freiburg, Germany; and <sup>¶</sup>FRIAS Freiburg Institute for Advanced Studies, University of Freiburg, Freiburg, Germany

**SUPPLEMENTARY TABLE 1:** Data are presented of a representative purification process. FHmoss was quantified by ELISA.

| Step                                                    | Volume [ml] | FH [ $\mu\text{g/ml}$ ] | FH [mg] | FH step recovery [%] | FH total recovery [%] |
|---------------------------------------------------------|-------------|-------------------------|---------|----------------------|-----------------------|
| Starting material ( <i>Physcomitrella</i> culture)      | 2000        | 9                       | 18      |                      |                       |
| Concentration/Dialfiltration                            | 354         | 38                      | 13.5    | 75                   |                       |
| Phenyl pool                                             | 140         | 41                      | 5.74    | 43                   |                       |
| Heparin load                                            | 1026        | 5                       | 4.75    | 83                   |                       |
| Heparin pool                                            | 44          | 60                      | 2.63    | 55                   | 15                    |
| Heparin pool concentrated                               | 0.25        | 9141                    | 2.29    | 87                   | 13                    |
| Heparin pool concentrated (0.22 $\mu\text{m}$ filtered) | 0.18        | 8758                    | 1.58    | 69                   | 9                     |

| A           |                  |             |             |             | B           |                  |             |             |             |
|-------------|------------------|-------------|-------------|-------------|-------------|------------------|-------------|-------------|-------------|
| MAFYKISSVF  | FIFCFLLIAL       | PFHSAEDC    | NELPPRRNTE  | ILTGWSWDQTY | MAFYKISSVF  | FIFCFLLIAL       | PFHSAEDC    | NELPPRRNTE  | ILTGWSWDQTY |
| PEGTQAIYKC  | RPGYRSLGNV       | IMVCRKGEWV  | ALNPLRKCQK  | RPCGHPGDTP  | PEGTQAIYKC  | RPGYRSLGNV       | IMVCRKGEWV  | ALNPLRKCQK  | RPCGHPGDTP  |
| FGTFTLTGGN  | VFEGYVKAVY       | TCNEGYQLLG  | EINyreCDTD  | GWTNDIPICE  | FGTFTLTGGN  | VFEGYVKAVY       | TCNEGYQLLG  | EINyreCDTD  | GWTNDIPICE  |
| VVKCLPVTAP  | ENGKIVSSAM       | EPDREYHFGQ  | AVRFVCSNGY  | KTEGDEEMHC  | VVKCLPVTAP  | ENGKIVSSAM       | EPDREYHFGQ  | AVRFVCSNGY  | KTEGDEEMHC  |
| SDDGFWSKEK  | PKCVEISCKS       | PDVIDGSPIS  | QKIYKENER   | FQYKCNMGYE  | SDDGFWSKEK  | PKCVEISCKS       | PDVIDGSPIS  | QKIYKENER   | FQYKCNMGYE  |
| YSERGDVACT  | ESGWRPLPSC       | EKSCDNPYI   | PNGDYSPLRI  | KHRTGDEITY  | YSERGDVACT  | ESGWRPLPSC       | EKSCDNPYI   | PNGDYSPLRI  | KHRTGDEITY  |
| QCRNGFYPAT  | RGNTAKCTST       | GWIPAPRCTL  | KPCDYPDIKH  | GGLYHENMRR  | QCRNGFYPAT  | RGNTAKCTST       | GWIPAPRCTL  | KPCDYPDIKH  | GGLYHENMRR  |
| PYFPVAVGKY  | YSYYCDEHFE       | TPSGSYWDHI  | HCTQDGWSPA  | VPCLRKCYFP  | PYFPVAVGKY  | YSYYCDEHFE       | TPSGSYWDHI  | HCTQDGWSPA  | VPCLRKCYFP  |
| YLENGYNQNY  | GRKFVQGKSI       | DVACHPGYALP | KAQTTVTTCM  | ENGWSPTPRC  | YLENGYNQNY  | GRKFVQGKSI       | DVACHPGYALP | KAQTTVTTCM  | ENGWSPTPRC  |
| IRVKTCCKSS  | IDIENGFISE       | SQYTYALKEK  | AKYQCKLGYV  | TADGETSGSI  | IRVKTCCKSS  | IDIENGFISE       | SQYTYALKEK  | AKYQCKLGYV  | TADGETSGSI  |
| TCGKDGWSAQ  | PTCIKSCDIP       | VFMNARTKND  | FTWFKLNDTL  | DYECHEGYES  | TCGKDGWSAQ  | PTCIKSCDIP       | VFMNARTKND  | FTWFKLNDTL  | DYECHEGYES  |
| NTGSTTGSIV  | CGYNGWSDLP       | ICYERECCLP  | KIDVHLVDPDR | KKDQYKVGVEV | NTGSTTGSIV  | CGYNGWSDLP       | ICYERECCLP  | KIDVHLVDPDR | KKDQYKVGVEV |
| LKFSCCKPGFT | IVGPNVQCY        | HFGLSPDLPI  | CKEQVQSCGP  | PELLNGNVK   | LKFSCCKPGFT | IVGPNVQCY        | HFGLSPDLPI  | CKEQVQSCGP  | PELLNGNVK   |
| EKTKEEYGH   | EVVEYYCNPR       | FLMKGPNKI   | QVDGEWTTLP  | VCIVEESTCG  | EKTKEEYGH   | EVVEYYCNPR       | FLMKGPNKI   | QVDGEWTTLP  | VCIVEESTCG  |
| DIPLEHGW    | QLSSPPYYG        | DSVEFNCSSES | FTMIGHRSIT  | CIHGVTQLP   | DIPLEHGW    | QLSSPPYYG        | DSVEFNCSSES | FTMIGHRSIT  | CIHGVTQLP   |
| QCVAIDKLLK  | CKSSNLIILE       | EHLKKNKEFD  | HNSNIRYRCR  | GKEGWIHTVC  | QCVAIDKLLK  | CKSSNLIILE       | EHLKKNKEFD  | HNSNIRYRCR  | GKEGWIHTVC  |
| INGRWDPEVN  | CSMAQIQLCP       | PPPQIPNSHN  | MTTTLNRYDG  | EKVSVLQDEN  | INGRWDPEVN  | CSMAQIQLCP       | PPPQIPNSHN  | MTTTLNRYDG  | EKVSVLQDEN  |
| YLIQEGEIT   | CKDGRWQSIP       | LCVEKIPCSQ  | PPQIEHGTIN  | SSRSQESYA   | YLIQEGEIT   | CKDGRWQSIP       | LCVEKIPCSQ  | PPQIEHGTIN  | SSRSQESYA   |
| HGTKLSYTC   | GGFRISEENE       | TTCYMGKWS   | PPQCEGLPCK  | SPPEISHGVV  | HGTKLSYTC   | GGFRISEENE       | TTCYMGKWS   | PPQCEGLPCK  | SPPEISHGVV  |
| AHMDSYQYG   | EEVYKCFEG        | FGIDGPAIAK  | CLGEKWSHPP  | SCIKTDCLSL  | AHMDSYQYG   | EEVYKCFEG        | FGIDGPAIAK  | CLGEKWSHPP  | SCIKTDCLSL  |
| PSFENAI     | PMG EKKDVYKAGE   | QVYTYCATYY  | KMDGASNVTC  | INSRWTGRPT  | PSFENAI     | PMG EKKDVYKAGE   | QVYTYCATYY  | KMDGASNVTC  | INSRWTGRPT  |
| CRDTSCVNPP  | TVQNAIIVSR       | QMSKYPSGER  | VRYQCRSPYE  | MFGDEEVMCL  | CRDTSCVNPP  | TVQNAIIVSR       | QMSKYPSGER  | VRYQCRSPYE  | MFGDEEVMCL  |
| NGNWT       | EPPQC KDSTGKCGPP | PPIDNGDITS  | FPLSVYAPAS  | SVEYQCQNL   | NGNWT       | EPPQC KDSTGKCGPP | PPIDNGDITS  | FPLSVYAPAS  | SVEYQCQNL   |
| QLEGNKRI    | TC RNCQWSEPPK    | CLHPCVISRE  | IMENYNIALR  | WTAKQKLYSR  | QLEGNKRI    | TC RNCQWSEPPK    | CLHPCVISRE  | IMENYNIALR  | WTAKQKLYSR  |
| TGESVEFVCK  | RGYRLSSRS        | HLRTRTCWDGK | LEYPTCAKR   |             | TGESVEFVCK  | RGYRLSSRS        | HLRTRTCWDGK | LEYPTCAKR   |             |

**Supplementary Figure 1.** Mass spectrometric detected sequence coverage of FHmoss. Shown is the mature FH sequence (black) fused to the *ToH1*-signal peptide (grey). Identified peptides are highlighted, N-glycosylation sites, including the deamidated site Asn199→Asp199, are underlined. FHmoss from the upper and the lower FH band was separately digested with trypsin, thermolysin or chymotrypsin, respectively and analyzed by nano LC-MS/MS on a Q-TOF instrument. The analyses of the raw data were performed with Mascot Distiller V2.4 and glycosylated peptides were identified manually. The highlighted peptides were identified with high confidence at a false discovery level of 0% on the protein as well as on the peptide level according to Protein- and PeptideProphet<sup>TM</sup> filtering with Scaffold4 software with a sequence coverage of 74 % for the upper FH band (A) and a sequence coverage of 57 % for the lower FH band (B).

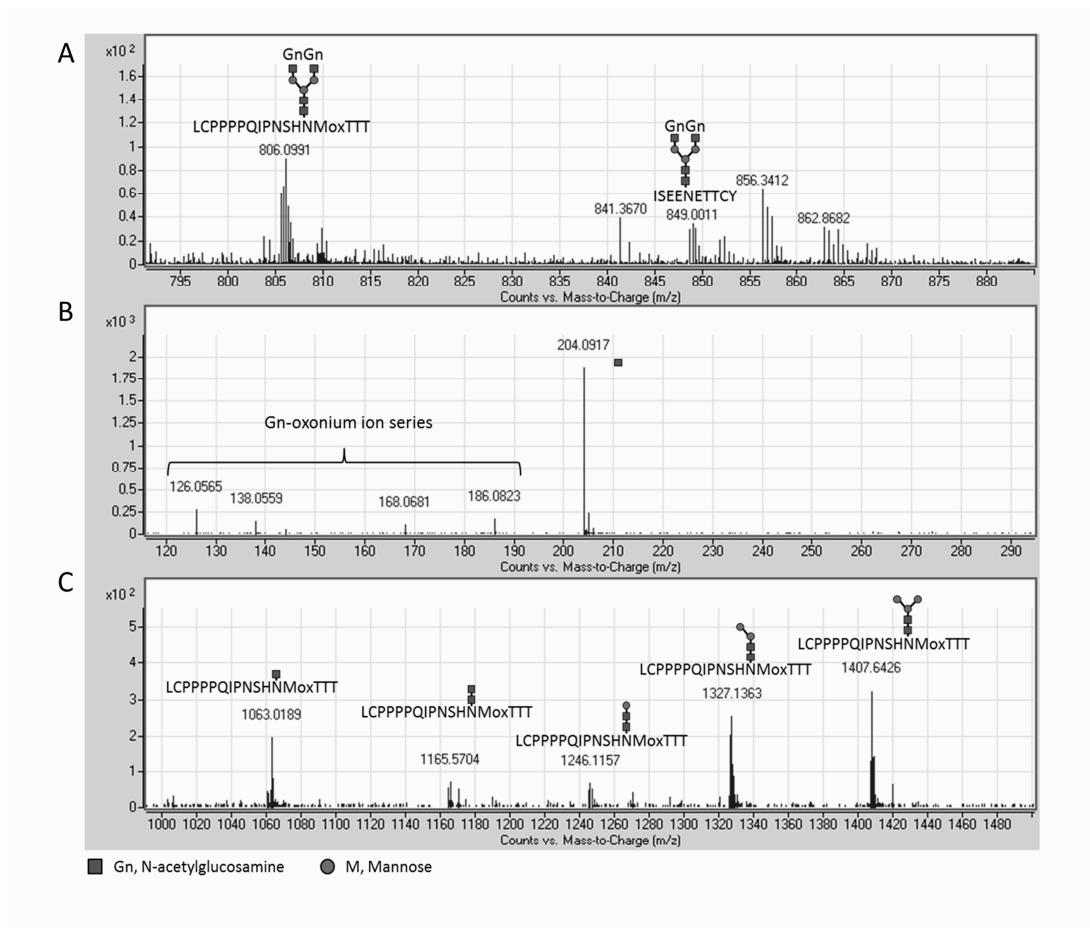

**Supplementary Figure 2.** Summed MS1 scans showing the glycosylated Asn804- and Asn893 glycosylation sites of FHmoss (A) and the proof of the Asn804 glycopeptide identity on MS2-level (B and C). FHmoss was digested with thermolysin and analyzed by nano LC-MS/MS on a Q-TOF instrument. (A) Among the identified peptides, the glycopeptide 792-808 (LCPPPPQIPNSHNMoxTTT, glycosylation site Asn804) with an oxidized methionin (Mox) and the glycopeptide 889-901 (ISEENETTCY, glycosylation site Asn893) were identified in a GnGn-glycosylated manner. (B and C) The glycopeptide identity of the GnGn-LCPPPPQIPNSHNMoxTTT glycopeptide could be proven on MS2 level by the identification of the N-glycan reporter ion N-acetylglucosamine (Gn,  $m/z = 204.0872$ ) and its oxonium ions with  $m/z = 186.0766$ ,  $168.0661$ ,  $138.0555$  and  $126.0555$  (B) and by the detection of  $m/z$ -values of product ions consisting of fragmented glycan structures attached to the intact peptide (C). Shown  $m/z$  values correspond to the most abundant isotope peak for each peptide. The monoisotopic masses for the identified glycopeptides are listed in table 1.

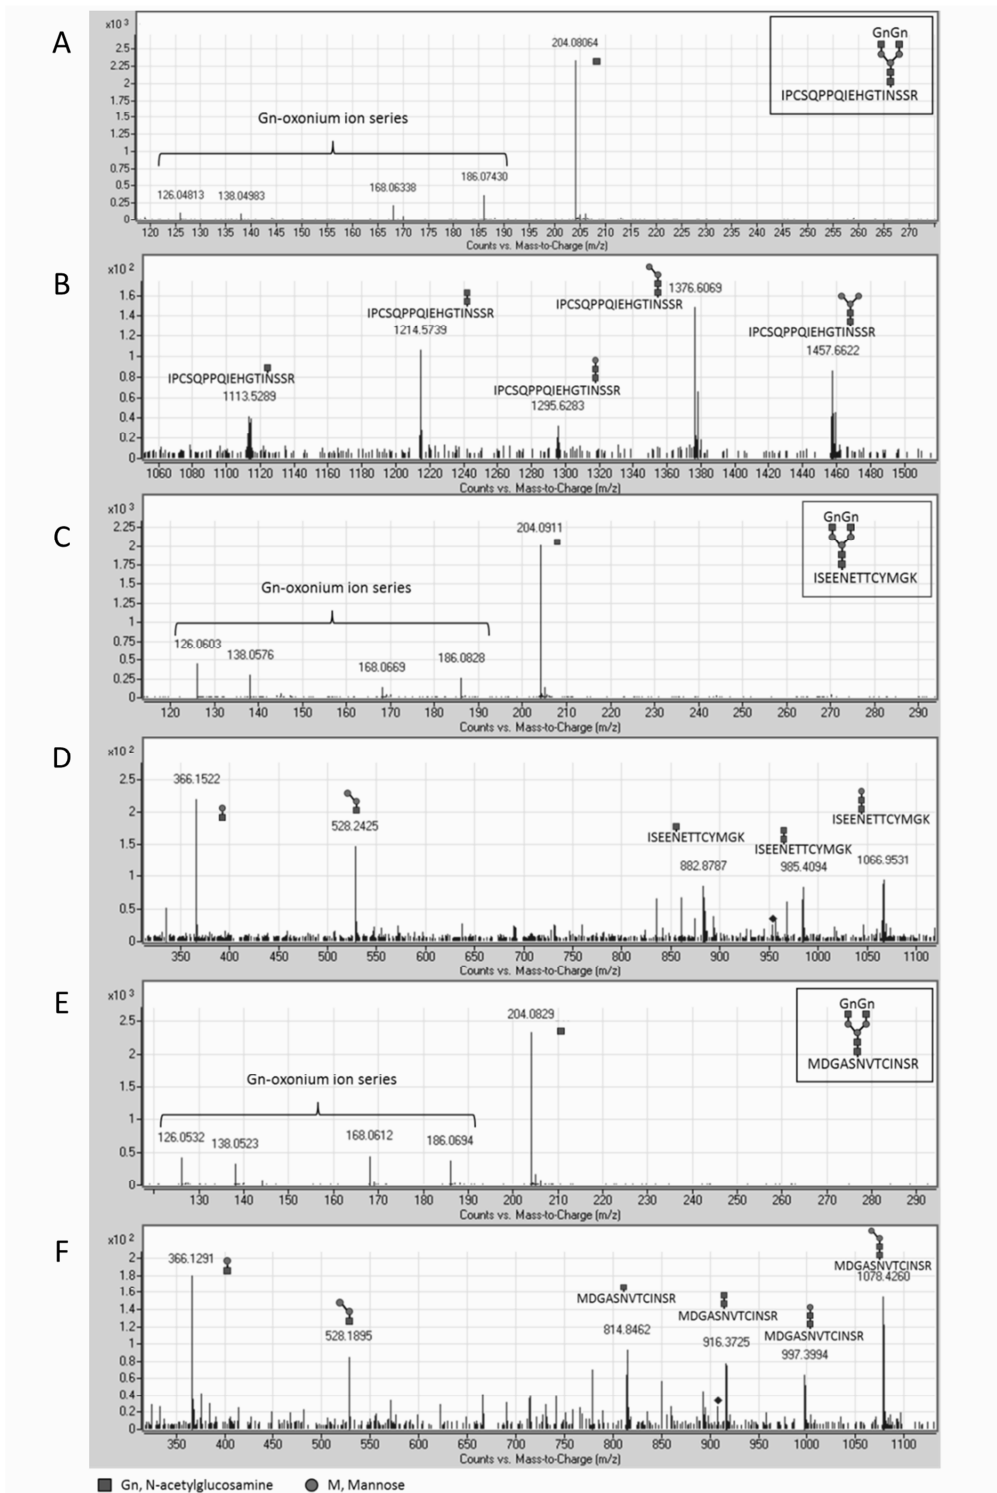

**Supplementary Figure 3.** MS2 spectra of detected N-glycosylation sites of FHmoss. FHmoss was tryptically digested and analyzed by nano LC-MS/MS on a Q-TOF instrument. Among the identified peptides, the glycopeptides 850-867 (IPCSQPPQIEHGTINSSR, glycosylation site Asn864) (A and B), 889-901 (ISEENETTCYMGK, glycosylation site Asn893) (C and D) and 1006-1018 (MDGASNVTCINSR, glycosylation site Asn1011) (E, F) were identified and proven by

MS2 spectra inspection. For each glycopeptide the presence of the N-glycan reporter ion N-acetylglucosamine (Gn,  $m/z = 204.0872$ ) and its oxonium ions with  $m/z = 186.0766$ ,  $168.0661$ ,  $138.0555$  and  $126.0555$  could be shown on MS2 level (A, C and E). Further, also N-glycan product ions consisting of fragmented glycan structures and glycan fragments attached to the intact peptide could be identified (B, D and F). Shown  $m/z$  values correspond to the most abundant isotope peak for each peptide. The monoisotopic masses for the identified glycopeptides are listed in table 1.

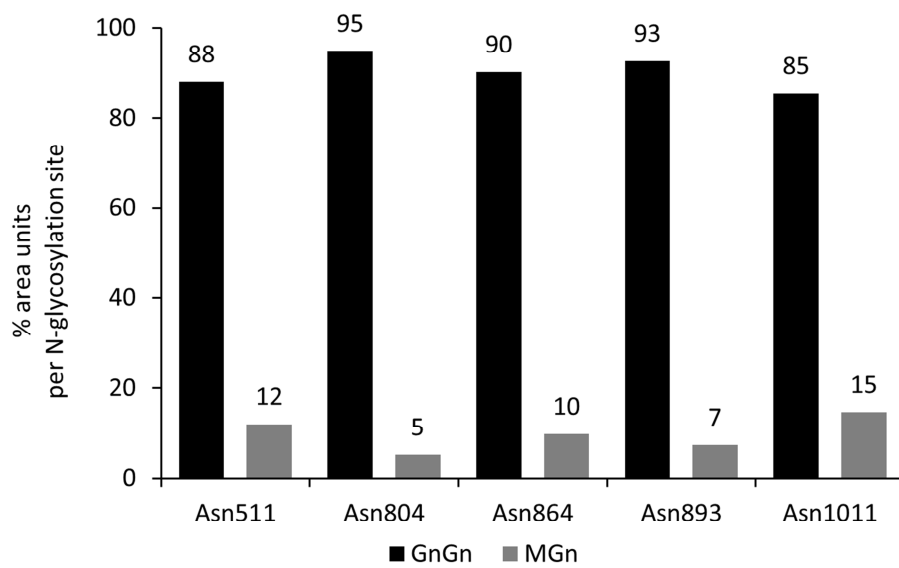

**Supplementary Figure 4.** Relative quantification of N-glycans identified on FHmoss. FHmoss was digested with trypsin, thermolysin and chymotrypsin, respectively and analyzed by nano LC-MS/MS on a Q-TOF instrument. Relative quantification is based in peak area integration of extracted ion chromatograms (EICs) for every on MS1 and/or in MS2 level identified N-glycan form at the respective glycosylation site.

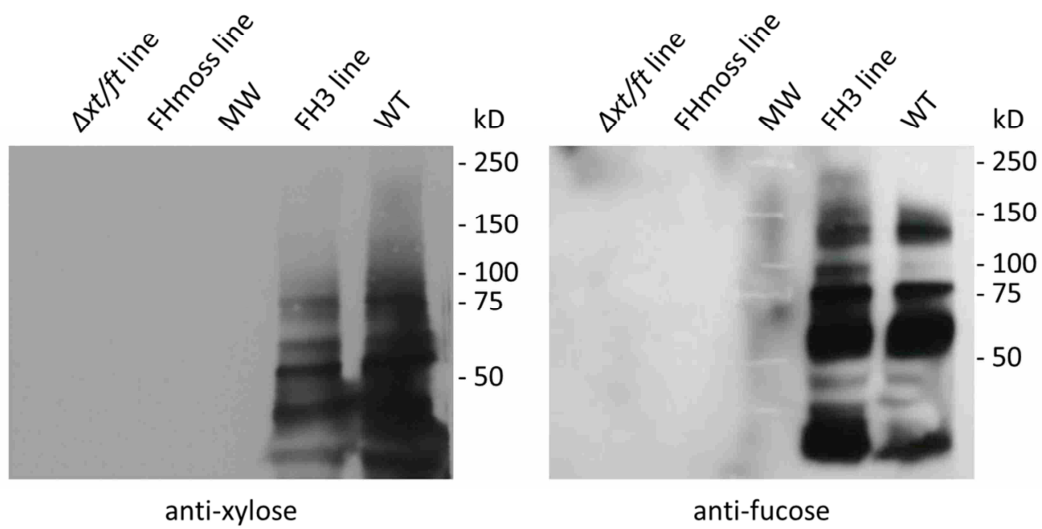

**Supplementary Figure 5.** FHmoss is devoid of plant-specific xylose and fucose. Western blots of total protein extracts of FHmoss-producing line, in which fucosyl- and xylosyltransferases have been knocked-out, and previous generation plant FH3<sup>38</sup>, with intact glycosyltransferases, and the respective parental plants  $\Delta xt/ft$  and WT. (A) Western blot using antibodies specifically recognizing  $\beta$ 1,2-linked xylose. (B) Western blot using antibodies specifically recognizing  $\alpha$ 1,3-linked fucose.
